# Supplementary material for: Facile one-step hydrothermal fabrication of single-crystalline ZnS nanobelts with narrow band-edge luminescence
Source: Royal Society of Chemistry journal article supplement (doi:10.1039/c3ra42401d), 2013-01-01
Supplement: c3ra42401d.pdf [file c3ra42401d.pdf]

Electronic Supplementary Information (ESI)

**Facile one-step hydrothermal fabrication of single-crystalline ZnS  
nanobelts with narrow band-edge luminescence**

Yeonho Kim and Du-Jeon Jang\*

*Department of Chemistry, Seoul National University, NS60, Seoul 151-747, Republic of Korea*

**Experimental Section**

**Synthesis.** The analytical grade chemicals of  $\text{N}_2\text{H}_4\cdot\text{H}_2\text{O}(\text{l})$ ,  $\text{C}_2\text{H}_4(\text{NH}_2)_2(\text{l})$ ,  $\text{ZnCl}_2(\text{s})$ , and  $\text{S}(\text{s})$  were used as purchased from Sigma-Aldrich. Deionized (DI) water with a resistivity of greater than  $18\text{ M}\Omega\text{ cm}$ , from a Millipore Milli-Q system, was used throughout the experiments. For the typical preparation of single-crystalline wurtzite ZnS nanobelts, 7.5 mL of  $\text{C}_2\text{H}_4(\text{NH}_2)_2$ , 7.5 mL of DI water, 15 mL of  $\text{N}_2\text{H}_4\cdot\text{H}_2\text{O}$ , 0.5 mmol of  $\text{ZnCl}_2$ , and 0.5 mmol of S were stirred vigorously for 30 min. The mixture solution was then loaded into a Teflon-lined stainless-steel autoclave of 50 mL capacity, placed in a preheated oven at  $180^\circ\text{C}$  for 6 h, and cooled to room temperature. A white precipitate produced in the reaction mixture was washed several times using DI water and ethanol separately, vacuum-dried, and kept for further characterization.

**Characterization.** While transmission electron microscopy (TEM) images were obtained with a JEOL JEM-2100 microscope, high-resolution TEM (HRTEM) images and fast Fourier transformation (FFT) patterns were measured using a JEOL JEM-3010 microscope. While scanning electron microscopy (SEM) images were recorded with a JEOL JSM-6700F microscope, high-angle annular dark-field scanning TEM (HAADF-STEM) images and energy-dispersive X-

ray (EDX) line-scanned elemental intensity profiles were measured using an FEI Tecnai F20 microscope. High-resolution X-ray diffraction (HRXRD) patterns were obtained with a Bruker D8 DISCOVER diffractometer using Cu K $\alpha$  radiation (0.15418 nm), and X-ray photoelectron spectroscopy (XPS) spectra were monitored using a Kratos AXIS-HSi spectrometer with an excitation source of Mg K $\alpha$  (1253.60 eV). Extinction spectra were obtained with a Scinco S3100 UV/vis spectrophotometer, and photoluminescence spectra were measured employing a Princeton Instruments ICCD576G CCD detector with excitation using 266 nm pulses from a Q-switched Quantel Brilliant Nd:YAG laser of 6 ns.

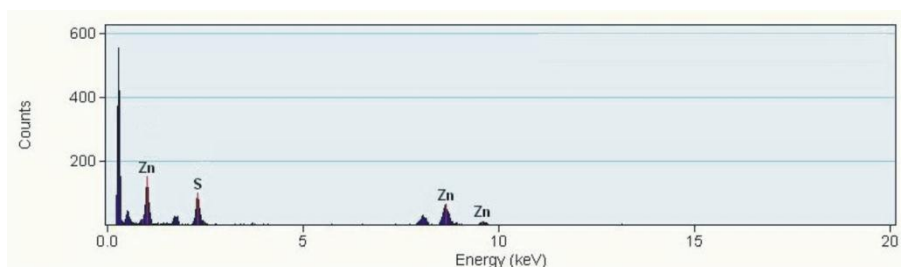

**Fig. S1** EDX profile of ZnS nanobelts showing the atomic molar ratio of Zn:S to be 1:1.01, very close to the stoichiometric ratio of ZnS.

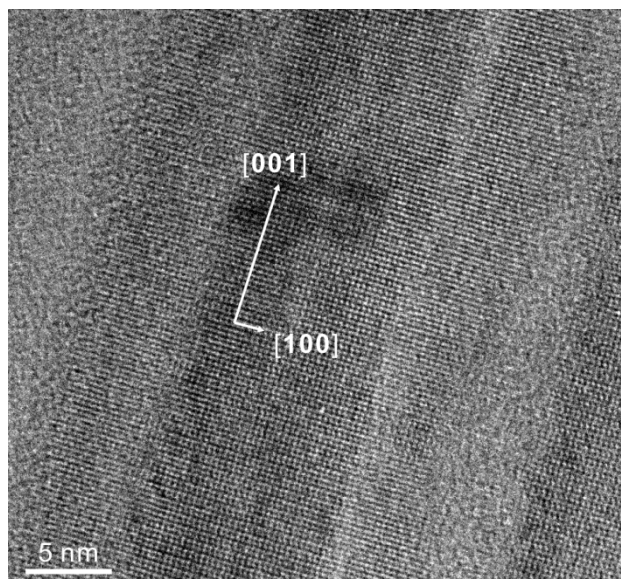

**Fig. S2** HRTEM image of a ZnS nanobelt.

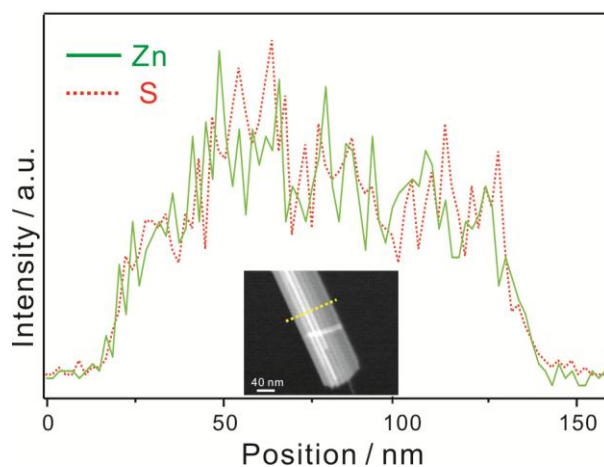

**Fig. S3** EDX line-scanned profiles, measured along the indicated dashed line of the insetted HAADF-STEM image.

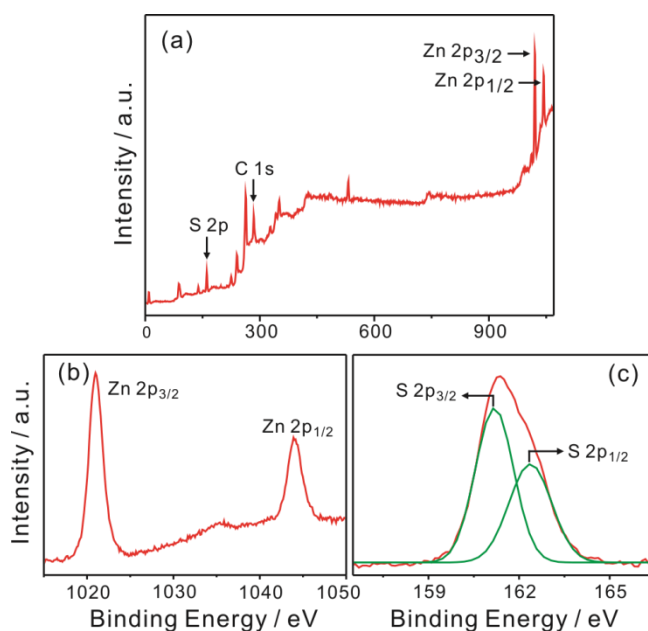

**Fig. S4** Complete survey (a), Zn 2p (b), and S 2p (c) XPS spectra of ZnS nanobelts. Two green curves in c have been deconvoluted from the Gaussian fitting.
